# Supplementary material for: Global prevalence of long-term neurodevelopmental impairment following extremely preterm birth: a systematic literature review
Source: PubMed Central journal article supplement — J Int Med Res. 2021 Jul 20;49(7):03000605211028026. doi: 10.1177/03000605211028026 (PMC8299900; doi:10.1177/03000605211028026), 2021-07-20
Supplement: sj-pdf-2-imr-10.1177_03000605211028026.pdf [file sj-pdf-2-imr-10.1177_03000605211028026.pdf]

## Appendix

Global prevalence of long-term neurodevelopmental impairment following extremely preterm birth: a systematic literature review

Supplemental Table 1. Embase (via Embase.com) search strategy.

| Search criteria and number             | Query                                                                                                                                                                                                                                                                                                                                                                                                                                                                                                                                                                                                                                                                                                                                                                                                                                                                                                                                                                                                                                                                                                                                                                                                                                                                                                                                                                                                                                                                                                                                                                                                                                                                                                                                                                                                                                                                                                                                                                                                                                                                                                                                                                                                                                                                                                  |
|----------------------------------------|--------------------------------------------------------------------------------------------------------------------------------------------------------------------------------------------------------------------------------------------------------------------------------------------------------------------------------------------------------------------------------------------------------------------------------------------------------------------------------------------------------------------------------------------------------------------------------------------------------------------------------------------------------------------------------------------------------------------------------------------------------------------------------------------------------------------------------------------------------------------------------------------------------------------------------------------------------------------------------------------------------------------------------------------------------------------------------------------------------------------------------------------------------------------------------------------------------------------------------------------------------------------------------------------------------------------------------------------------------------------------------------------------------------------------------------------------------------------------------------------------------------------------------------------------------------------------------------------------------------------------------------------------------------------------------------------------------------------------------------------------------------------------------------------------------------------------------------------------------------------------------------------------------------------------------------------------------------------------------------------------------------------------------------------------------------------------------------------------------------------------------------------------------------------------------------------------------------------------------------------------------------------------------------------------------|
| Patient population                     |                                                                                                                                                                                                                                                                                                                                                                                                                                                                                                                                                                                                                                                                                                                                                                                                                                                                                                                                                                                                                                                                                                                                                                                                                                                                                                                                                                                                                                                                                                                                                                                                                                                                                                                                                                                                                                                                                                                                                                                                                                                                                                                                                                                                                                                                                                        |
| 1                                      | 'premature'/exp OR premature:ab,ti OR 'low birthweight'/exp OR 'small for gestational age':ab,ti OR 'small for date':ab,ti OR lbw:ab,ti OR vlbw:ab,ti OR prematur*:ab,ti OR preterm:ab,ti OR (low:ab,ti AND (birth:ab,ti AND weight:ab,ti OR birthweight:ab,ti)) AND ('infant'/exp OR 'infant':ab,ti) OR preemie:ab,ti OR 'small for date infant'/exp OR 'small for gestational age'/exp                                                                                                                                                                                                                                                                                                                                                                                                                                                                                                                                                                                                                                                                                                                                                                                                                                                                                                                                                                                                                                                                                                                                                                                                                                                                                                                                                                                                                                                                                                                                                                                                                                                                                                                                                                                                                                                                                                               |
| Long-term outcomes and clinical burden |                                                                                                                                                                                                                                                                                                                                                                                                                                                                                                                                                                                                                                                                                                                                                                                                                                                                                                                                                                                                                                                                                                                                                                                                                                                                                                                                                                                                                                                                                                                                                                                                                                                                                                                                                                                                                                                                                                                                                                                                                                                                                                                                                                                                                                                                                                        |
| 2                                      | 'developmental disabilities'/exp OR 'neurologic manifestations':ab,ti OR monoplegia*:ab,ti OR diplegi*:ab,ti OR hemiplegi*:ab,ti OR quadriplegi*:ab,ti OR tetraplegi*:ab,ti OR monopare*:ab,ti OR dipare*:ab,ti OR hemipare*:ab,ti OR quadripare*:ab,ti OR tetrapare*:ab,ti OR (cerebral:ab,ti AND palsy:ab,ti) OR 'cerebral palsy':ab,ti OR spastic*:ab,ti OR hypertoni*:ab,ti OR dystoni*:ab,ti OR dyskene*:ab,ti OR ataxi*:ab,ti OR chorea*:ab,ti OR choreic*:ab,ti OR choreo*:ab,ti OR athetos*:ab,ti OR athetoid*:ab,ti OR (neurodevelopmental:ab,ti OR neurologic*:ab,ti OR developmental:ab,ti OR intellectual:ab,ti OR neuromuscular:ab,ti OR motor:ab,ti OR neuromotor:ab,ti AND (disab*:ab,ti OR impair:ab,ti OR delay:ab,ti OR deviat*:ab,ti OR disorder:ab,ti OR dysfunction:ab,ti)) OR 'hypoischemic encephalopathy':ab,ti OR (brain* OR cerebral AND coagulation AND necrosis) OR (neonatal:ab,ti AND white:ab,ti AND matter AND injury:ab,ti) OR (periventricular*:ab,ti AND (encephalomalacia:ab,ti OR leukomalacia:ab,ti)) OR (cerebral*:ab,ti AND (leukomalacia:ab,ti OR encephalomalacia:ab,ti)) OR (intraventricular:ab,ti AND (hemorrhage:ab,ti OR haemorrhage:ab,ti)) OR (brain:ab,ti OR cerebral:ab,ti OR encephalopathy:ab,ti AND (hypoxi*:ab,ti OR anoxi*:ab,ti OR ischemi*:it,ab OR ischaemi*:ab,ti)) OR (central:ab,ti AND nerve:ab,ti AND system:ab,ti AND disease*:ab,ti) OR (retrolental:ab,ti AND fibroplasia:ab,ti) OR 'retinopathy of prematurity':ab,ti OR 'neonatal respiratory distress syndrome':ab,ti OR (lung:ab,ti OR bronchopulmonary:ab,ti AND dysplasia:ab,ti) OR 'growth impairment':ab,ti OR 'persistent hyperinsulinemic hypoglycemia of infancy':ab,ti OR 'congenital hyperinsulinism':ab,ti OR 'neonatal hypoglycemia':ab,ti OR 'necrotizing enterocolitis':ab,ti OR 'burden of illness':ab,ti OR 'burden of disease':ab,ti OR 'bayley scales of infant and toddler development':ab,ti OR 'bsid':ab,ti OR 'wechsler preschool and primary scale of Intelligence':ab,ti OR 'wppsi':ab,ti OR 'vineland scales of adaptive behavior':ab,ti OR 'vabs':ab,ti OR 'child behavior checklist':ab,ti OR 'cbcl':ab,ti OR 'social communication questionnaire':ab,ti OR 'scq':ab,ti OR 'adhd rating scale':ab,ti OR 'adhd-rs':ab,ti OR 'hearing impairment':ab,ti |
| 3                                      | epidemiology/exp OR inciden*:ab,ti OR prevalen*:ab,ti OR demograph*:ab,ti OR epidemiolog*:ab,ti OR frequen*:ab,ti OR rate:ab,ti OR distribut*:ab,ti                                                                                                                                                                                                                                                                                                                                                                                                                                                                                                                                                                                                                                                                                                                                                                                                                                                                                                                                                                                                                                                                                                                                                                                                                                                                                                                                                                                                                                                                                                                                                                                                                                                                                                                                                                                                                                                                                                                                                                                                                                                                                                                                                    |

|                        |                                                                                                                                                                                                                                                                                                                                                                                                                         |
|------------------------|-------------------------------------------------------------------------------------------------------------------------------------------------------------------------------------------------------------------------------------------------------------------------------------------------------------------------------------------------------------------------------------------------------------------------|
| 4                      | #1 AND #2 AND #3                                                                                                                                                                                                                                                                                                                                                                                                        |
| Study design           |                                                                                                                                                                                                                                                                                                                                                                                                                         |
| 5                      | 'cohort analysis'/exp OR 'cross-sectional study'/exp OR reglst*:ab,ti OR 'database':ab,ti OR 'cohort study':ab,ti OR 'cohort studies':ab,ti OR 'cohort analysis':ab,ti OR 'cohort analyses':ab,ti OR 'observational':ab,ti OR 'longitudinal':ab,ti OR 'retrospective':ab,ti OR 'prospective':ab,ti OR 'cross sectional':ab,ti OR 'real world':ab,ti                                                                     |
| 6                      | #4 AND #5                                                                                                                                                                                                                                                                                                                                                                                                               |
| Interventional studies |                                                                                                                                                                                                                                                                                                                                                                                                                         |
| 7                      | 'randomized controlled trial'/exp OR 'randomization'/exp OR random*:ab,ti OR 'rct':ab,ti OR 'controlled trial':ab,ti OR 'clinical trial':ab,ti OR 'single blind procedure'/exp OR 'double blind procedure'/exp OR 'crossover procedure'/exp OR 'cross over':ab,ti OR 'crossover':ab,ti OR 'placebo'/exp OR 'placebo':ab,ti OR (doubl* AND blind*:ab,ti) OR (singl* AND blind*:ab,ti) OR ('open':ab,ti AND label*:ab,ti) |
| Nonsystematic reviews  |                                                                                                                                                                                                                                                                                                                                                                                                                         |
| 8                      | 'case study'/exp OR 'letter'/exp OR 'editorial'/exp OR (review:it NOT (systematic OR meta AND analy* OR (indirect OR mixed AND 'treatment comparison')))) OR ('animal'/exp NOT 'human'/exp)                                                                                                                                                                                                                             |
| 9                      | #6 NOT #7 NOT #8                                                                                                                                                                                                                                                                                                                                                                                                        |
| 10                     | #9 (English language only; humans; with an abstract; 2011-2016)                                                                                                                                                                                                                                                                                                                                                         |

Supplemental Table 2. MEDLINE (via PubMed) search strategy.

| Search criteria and number             | Query                                                                                                                                                                                                                                                                                                                                                                                                                                                                                                                                                                                                                                                                                                                                                                                                                                                                                                                                                                                                                                                                                                                                                                                                                              |
|----------------------------------------|------------------------------------------------------------------------------------------------------------------------------------------------------------------------------------------------------------------------------------------------------------------------------------------------------------------------------------------------------------------------------------------------------------------------------------------------------------------------------------------------------------------------------------------------------------------------------------------------------------------------------------------------------------------------------------------------------------------------------------------------------------------------------------------------------------------------------------------------------------------------------------------------------------------------------------------------------------------------------------------------------------------------------------------------------------------------------------------------------------------------------------------------------------------------------------------------------------------------------------|
| Patient population                     |                                                                                                                                                                                                                                                                                                                                                                                                                                                                                                                                                                                                                                                                                                                                                                                                                                                                                                                                                                                                                                                                                                                                                                                                                                    |
| 1                                      | “premature”[MeSH] OR premature[TIAB] OR “low birthweight”[MeSH] OR “small for gestational age”[TIAB] OR “small for date”[TIAB] OR lbw[TIAB] OR vlbw[TIAB] OR prematur*[TIAB] OR preterm[TIAB] OR (low[TIAB] AND (birth[TIAB] AND weight[TIAB] OR birthweight[TIAB])) AND (“infant”[MeSH] OR “infant”[TIAB]) OR preemie[TIAB] OR “small for date infant”[MeSH]                                                                                                                                                                                                                                                                                                                                                                                                                                                                                                                                                                                                                                                                                                                                                                                                                                                                      |
| Long-term outcomes and clinical burden |                                                                                                                                                                                                                                                                                                                                                                                                                                                                                                                                                                                                                                                                                                                                                                                                                                                                                                                                                                                                                                                                                                                                                                                                                                    |
| 2                                      | “developmental disabilities”[MeSH] OR “neurologic manifestations”[TIAB] OR monoplegia*[TIAB] OR diplegi*[TIAB] OR hemiplegi*[TIAB] OR quadriplegi*[TIAB] OR tetraplegi*[TIAB] OR monopare*[TIAB] OR dipare*[TIAB] OR hemipare*[TIAB] OR quadripare*[TIAB] OR tetrapare*[TIAB] OR (cerebral[TIAB] AND palsy[TIAB]) OR “cerebral palsy”[TIAB] OR spastic*[TIAB] OR hypertoni*[TIAB] OR dystoni*[TIAB] OR dyskene*[TIAB] OR ataxi*[TIAB] OR chorea*[TIAB] OR choreic*[TIAB] OR choreo*[TIAB] OR athetos*[TIAB] OR athetoid*[TIAB] OR (neurodevelopmental[TIAB] OR neurologic*[TIAB] OR developmental[TIAB] OR intellectual[TIAB] OR neuromuscular[TIAB] OR motor[TIAB] OR neuromotor[TIAB] AND (disab*[TIAB] OR impair[TIAB] OR delay[TIAB] OR deviat*[TIAB] OR disorder[TIAB] OR dysfunction[TIAB])) OR “hypoischemic encephalopathy”[TIAB] OR (brain* OR cerebral AND coagulation AND necrosis) OR (neonatal[TIAB] AND white[TIAB] AND matter AND injury[TIAB]) OR (periventricular*[TIAB] AND (encephalomalacia[TIAB] OR leukomalacia[TIAB])) OR (cerebral*[TIAB] AND (leukomalacia[TIAB] OR encephalomalacia[TIAB])) OR (intraventricular[TIAB] AND (hemorrhage[TIAB] OR haemorrhage[TIAB])) OR (brain[TIAB] OR cerebral[TIAB] OR |

---

|              |                                                                                                                                                                                                                                                                                                                                                                                                                                                                                                                                                                                                                                                                                                                                                                                                                                                                                                                                                                                                                                                                            |
|--------------|----------------------------------------------------------------------------------------------------------------------------------------------------------------------------------------------------------------------------------------------------------------------------------------------------------------------------------------------------------------------------------------------------------------------------------------------------------------------------------------------------------------------------------------------------------------------------------------------------------------------------------------------------------------------------------------------------------------------------------------------------------------------------------------------------------------------------------------------------------------------------------------------------------------------------------------------------------------------------------------------------------------------------------------------------------------------------|
|              | encephalopathy[TIAB] AND (hypoxi*[TIAB] OR anoxi*[TIAB] OR ischemi*:.it,ab OR ischaemi*[TIAB])) OR (central[TIAB] AND nerve[TIAB] AND system[TIAB] AND disease*[TIAB]) OR (retrolental[TIAB] AND fibroplasia[TIAB]) OR “retinopathy of prematurity”[TIAB] OR “neonatal respiratory distress syndrome”[TIAB] OR (lung[TIAB] OR bronchopulmonary[TIAB] AND dysplasia[TIAB]) OR “growth impairment”[TIAB] OR “persistent hyperinsulinemic hypoglycemia of infancy”[TIAB] OR “congenital hyperinsulinism”[TIAB] OR “neonatal hypoglycemia”[TIAB] OR “necrotizing enterocolitis”[TIAB] OR “burden of illness”[TIAB] OR “burden of disease”[TIAB] OR bod[TIAB] OR “bayley scales of infant and toddler development”[TIAB] OR bsid[TIAB] OR “wechsler preschool and primary scale of intelligence”[TIAB] OR wppsi[TIAB] OR “vineland scales of adaptive behaviour”[TIAB] OR vabs[TIAB] OR “child behavior checklist”[TIAB] OR cbel[TIAB] OR 'social communication questionnaire”[TIAB] OR scq[TIAB] OR “adhd rating scale”[TIAB] OR “adhd-rs”[TIAB] OR “hearing impairment”[TIAB] |
| 3            | epidemiology[MeSH] OR inciden*[TIAB] OR prevalen*[TIAB] OR demograph*[TIAB] OR epidemiolog*[TIAB] OR frequen*[TIAB] OR rate[TIAB] OR distribut*[TIAB]                                                                                                                                                                                                                                                                                                                                                                                                                                                                                                                                                                                                                                                                                                                                                                                                                                                                                                                      |
| 4            | #1 AND #2 AND #3                                                                                                                                                                                                                                                                                                                                                                                                                                                                                                                                                                                                                                                                                                                                                                                                                                                                                                                                                                                                                                                           |
| Study design |                                                                                                                                                                                                                                                                                                                                                                                                                                                                                                                                                                                                                                                                                                                                                                                                                                                                                                                                                                                                                                                                            |
| 5            | "observational study"[TIAB] OR "observational studies"[TIAB] OR "longitudinal study"[TIAB] OR "longitudinal studies"[TIAB] OR "longitudinal studies"[Mesh] OR "retrospective"[TIAB] OR "retrospective studies"[Mesh] OR "prospective"[TIAB] OR "prospective studies"[Mesh] OR "cohort studies"[Mesh] OR "cohort study"[TIAB] OR "cohort studies"[TIAB] OR "cohort analysis"[TIAB] OR "cohort analyses"[TIAB] OR "follow up study"[TIAB] OR "follow up studies"[TIAB] OR "cross-sectional studies"[Mesh] OR "cross-sectional study"[TIAB] OR "cross-sectional studies"[TIAB] OR "cross sectional study"[TIAB] OR "cross sectional studies"[TIAB] OR survey*[TIAB] OR database*[TIAB] OR "data source"[TIAB] OR "datasource"[TIAB] OR "Registries"[Mesh] OR registry[TIAB] OR registries[TIAB] OR "chart review"[TIAB] OR "real world"[TIAB]                                                                                                                                                                                                                                 |
| 6            | #4 AND #5                                                                                                                                                                                                                                                                                                                                                                                                                                                                                                                                                                                                                                                                                                                                                                                                                                                                                                                                                                                                                                                                  |
| 7            | "Randomized Controlled Trial"[Publication Type] OR "Random Allocation"[Mesh] OR "Single-Blind Method"[Mesh] OR "Double-Blind Method"[Mesh] OR "Cross-Over Studies"[Mesh] OR "Placebos"[Mesh] OR random*[TIAB] OR “rct”[TIAB] OR “controlled trial”[TIAB] OR “clinical trial”[TIAB] OR “cross over”[TIAB] OR “crossover”[TIAB] OR “placebo”[TIAB] OR (doubl* AND blind*[TIAB]) OR (singl* AND blind*[TIAB]) OR (“open”[TIAB]AND label*[TIAB]) OR factorial*[TIAB] OR assign*[TIAB] OR allocate*[TIAB] OR volunteer*[TIAB]                                                                                                                                                                                                                                                                                                                                                                                                                                                                                                                                                   |
| 8            | "Case Reports" [Publication Type] OR "Letter" [Publication Type] OR "Editorial" [Publication Type]                                                                                                                                                                                                                                                                                                                                                                                                                                                                                                                                                                                                                                                                                                                                                                                                                                                                                                                                                                         |
| 9            | review[Publication Type] NOT (systematic OR meta AND analy* OR (indirect OR mixed AND "treatment comparison"))                                                                                                                                                                                                                                                                                                                                                                                                                                                                                                                                                                                                                                                                                                                                                                                                                                                                                                                                                             |
| 10           | #6 NOT #7 NOT #8 NOT #9                                                                                                                                                                                                                                                                                                                                                                                                                                                                                                                                                                                                                                                                                                                                                                                                                                                                                                                                                                                                                                                    |
| 11           | #10 (English language only; humans; with an abstract; 2011-2016)                                                                                                                                                                                                                                                                                                                                                                                                                                                                                                                                                                                                                                                                                                                                                                                                                                                                                                                                                                                                           |

---

Supplemental Table 3. MEDLINE In-Process (via PubMed) search strategy.

| Search criteria and number             | Query                                                                                                                                                                                                                                                                                                                                                                                                                                                                                                                                                                                                                                                                                                                                                                                                                                                                                                                                                                                                                                                                                                                                                                                                                                                                                                                                                                                                                                                                                                                                                                                                                                                                                                                                                                                                                                                                                                                                                                                                                                                                                                                                                                                                                                                                                                        |
|----------------------------------------|--------------------------------------------------------------------------------------------------------------------------------------------------------------------------------------------------------------------------------------------------------------------------------------------------------------------------------------------------------------------------------------------------------------------------------------------------------------------------------------------------------------------------------------------------------------------------------------------------------------------------------------------------------------------------------------------------------------------------------------------------------------------------------------------------------------------------------------------------------------------------------------------------------------------------------------------------------------------------------------------------------------------------------------------------------------------------------------------------------------------------------------------------------------------------------------------------------------------------------------------------------------------------------------------------------------------------------------------------------------------------------------------------------------------------------------------------------------------------------------------------------------------------------------------------------------------------------------------------------------------------------------------------------------------------------------------------------------------------------------------------------------------------------------------------------------------------------------------------------------------------------------------------------------------------------------------------------------------------------------------------------------------------------------------------------------------------------------------------------------------------------------------------------------------------------------------------------------------------------------------------------------------------------------------------------------|
| Patient population                     |                                                                                                                                                                                                                                                                                                                                                                                                                                                                                                                                                                                                                                                                                                                                                                                                                                                                                                                                                                                                                                                                                                                                                                                                                                                                                                                                                                                                                                                                                                                                                                                                                                                                                                                                                                                                                                                                                                                                                                                                                                                                                                                                                                                                                                                                                                              |
| 1                                      | “premature”[MeSH] OR premature[TIAB] OR “low birthweight”[MeSH] OR “small for gestational age”[TIAB] OR “small for date”[TIAB] OR lbw[TIAB] OR vlbw[TIAB] OR prematur*[TIAB] OR preterm[TIAB] OR (low[TIAB] AND (birth[TIAB] AND weight[TIAB] OR birthweight[TIAB])) AND (“infant”[MeSH] OR “infant”[TIAB]) OR preemie[TIAB] OR “small for date infant”[MeSH]                                                                                                                                                                                                                                                                                                                                                                                                                                                                                                                                                                                                                                                                                                                                                                                                                                                                                                                                                                                                                                                                                                                                                                                                                                                                                                                                                                                                                                                                                                                                                                                                                                                                                                                                                                                                                                                                                                                                                |
| Long-term outcomes and clinical burden |                                                                                                                                                                                                                                                                                                                                                                                                                                                                                                                                                                                                                                                                                                                                                                                                                                                                                                                                                                                                                                                                                                                                                                                                                                                                                                                                                                                                                                                                                                                                                                                                                                                                                                                                                                                                                                                                                                                                                                                                                                                                                                                                                                                                                                                                                                              |
| 2                                      | “developmental disabilities”[MeSH] OR “neurologic manifestations”[TIAB] OR monoplegia*[TIAB] OR diplegi*[TIAB] OR hemiplegi*[TIAB] OR quadriplegi*[TIAB] OR tetraplegi*[TIAB] OR monopare*[TIAB] OR dipare*[TIAB] OR hemipare*[TIAB] OR quadripare*[TIAB] OR tetrapare*[TIAB] OR (cerebral[TIAB] AND palsy[TIAB]) OR “cerebral palsy”[TIAB] OR spastic*[TIAB] OR hypertoni*[TIAB] OR dystoni*[TIAB] OR dyskene*[TIAB] OR ataxi*[TIAB] OR chorea*[TIAB] OR choreic*[TIAB] OR choreo*[TIAB] OR athetos*[TIAB] OR athetoid*[TIAB] OR (neurodevelopmental[TIAB] OR neurologic*[TIAB] OR developmental[TIAB] OR intellectual[TIAB] OR neuromuscular[TIAB] OR motor[TIAB] OR neuromotor[TIAB] AND (disab*[TIAB] OR impair[TIAB] OR delay[TIAB] OR deviat*[TIAB] OR disorder[TIAB] OR dysfunction[TIAB])) OR “hypoischemic encephalopathy”[TIAB] OR (brain* OR cerebral AND coagulation AND necrosis) OR (neonatal[TIAB] AND white[TIAB] AND matter AND injury[TIAB]) OR (periventricular*[TIAB] AND (encephalomalacia[TIAB] OR leukomalacia[TIAB])) OR (cerebral*[TIAB] AND (leukomalacia[TIAB] OR encephalomalacia[TIAB])) OR (intraventricular[TIAB] AND (hemorrhage[TIAB] OR haemorrhage[TIAB])) OR (brain[TIAB] OR cerebral[TIAB] OR encephalopathy[TIAB] AND (hypoxi*[TIAB] OR anoxi*[TIAB] OR ischemi*:it,ab OR ischaemi*[TIAB])) OR (central[TIAB] AND nerve[TIAB] AND system[TIAB] AND disease*[TIAB]) OR (retrolental[TIAB] AND fibroplasia[TIAB]) OR “retinopathy of prematurity”[TIAB] OR “neonatal respiratory distress syndrome”[TIAB] OR (lung[TIAB] OR bronchopulmonary[TIAB] AND dysplasia[TIAB]) OR “growth impairment”[TIAB] OR “persistent hyperinsulinemic hypoglycemia of infancy”[TIAB] OR “congenital hyperinsulinism”[TIAB] OR “neonatal hypoglycemia”[TIAB] OR “necrotizing enterocolitis”[TIAB] OR “burden of illness”[TIAB] OR “burden of disease”[TIAB] OR bod[TIAB] OR “bayley scales of infant and toddler development”[TIAB] OR bsid[TIAB] OR “wechsler preschool and primary scale of intelligence”[TIAB] OR wppsi[TIAB] OR “vineland scales of adaptive behaviour”[TIAB] OR vabs[TIAB] OR “child behavior checklist”[TIAB] OR cbcl[TIAB] OR 'social communication questionnaire”[TIAB] OR scq[TIAB] OR “adhd rating scale”[TIAB] OR “adhd-rs”[TIAB] OR “hearing impairment”[TIAB] |
| Limit to in-process records            |                                                                                                                                                                                                                                                                                                                                                                                                                                                                                                                                                                                                                                                                                                                                                                                                                                                                                                                                                                                                                                                                                                                                                                                                                                                                                                                                                                                                                                                                                                                                                                                                                                                                                                                                                                                                                                                                                                                                                                                                                                                                                                                                                                                                                                                                                                              |
| 3                                      | inprocess[SB]                                                                                                                                                                                                                                                                                                                                                                                                                                                                                                                                                                                                                                                                                                                                                                                                                                                                                                                                                                                                                                                                                                                                                                                                                                                                                                                                                                                                                                                                                                                                                                                                                                                                                                                                                                                                                                                                                                                                                                                                                                                                                                                                                                                                                                                                                                |
| Nonsystematic review                   |                                                                                                                                                                                                                                                                                                                                                                                                                                                                                                                                                                                                                                                                                                                                                                                                                                                                                                                                                                                                                                                                                                                                                                                                                                                                                                                                                                                                                                                                                                                                                                                                                                                                                                                                                                                                                                                                                                                                                                                                                                                                                                                                                                                                                                                                                                              |
| 4                                      | review[Publication Type] NOT (systematic OR meta AND analy* OR (indirect OR mixed AND "treatment comparison"))                                                                                                                                                                                                                                                                                                                                                                                                                                                                                                                                                                                                                                                                                                                                                                                                                                                                                                                                                                                                                                                                                                                                                                                                                                                                                                                                                                                                                                                                                                                                                                                                                                                                                                                                                                                                                                                                                                                                                                                                                                                                                                                                                                                               |
| Combined                               |                                                                                                                                                                                                                                                                                                                                                                                                                                                                                                                                                                                                                                                                                                                                                                                                                                                                                                                                                                                                                                                                                                                                                                                                                                                                                                                                                                                                                                                                                                                                                                                                                                                                                                                                                                                                                                                                                                                                                                                                                                                                                                                                                                                                                                                                                                              |

Supplemental Table 4. Inclusion and exclusion criteria.

|                  | Inclusion criteria                                                                                                                                                                                                                                                                                                                                                                                                                                | Exclusion criteria                                                                                                                                                                                       |
|------------------|---------------------------------------------------------------------------------------------------------------------------------------------------------------------------------------------------------------------------------------------------------------------------------------------------------------------------------------------------------------------------------------------------------------------------------------------------|----------------------------------------------------------------------------------------------------------------------------------------------------------------------------------------------------------|
| Study population | Humans born at $\leq 27$ weeks 6 days GA or $\leq 28$ wGA (studies with extremely preterm population only, or in which extremely preterm included as subgroups in studies with infants $> 28$ wGA)                                                                                                                                                                                                                                                | Born at $> 27$ weeks 6 days GA<br><br>Mixed populations (preterm and term neonates) without subgroup analysis by GA at birth                                                                             |
|                  | To take into account variations in the reporting of GA at birth, we allowed expanded inclusion criteria: <ul style="list-style-type: none"> <li>• <math>&lt; 29</math> wGA</li> <li>• <math>\leq 28</math> or <math>&lt; 29</math> wGA and/or BW <math>&lt; 1000</math> g</li> <li>• Upper limit of range of GA <math>&lt; 28</math> wGA in study sample, although the inclusion criteria specifically report <math>&gt; 28</math> wGA</li> </ul> | Studies in which no information on GA is provided (only information on BW)<br><br>Studies in which average values (mean, median) and variation (SD, IQR) are reported without information on upper limit |
| Outcomes         | Neurodevelopmental impairment                                                                                                                                                                                                                                                                                                                                                                                                                     | Publications that report only data from <i>in vitro</i> , animal, molecular, genetic, pathologic, or pharmacokinetic/ pharmacodynamic studies                                                            |
| Study design     | Epidemiological: population/registry<br><br>Observational: prospective cohort; retrospective cohort; cross sectional                                                                                                                                                                                                                                                                                                                              | Intervention study<br><br>Clinical trial<br><br>Meta-analyses of randomized controlled trials and interventional studies                                                                                 |
| Language         | English                                                                                                                                                                                                                                                                                                                                                                                                                                           | Non-English full text                                                                                                                                                                                    |

BW, birth weight; GA, gestational age; IQR, interquartile range; SD, standard deviation; wGA, weeks gestational age.

Supplemental Table 5. NDI assessment tools used in the included studies reporting NDI.

| Assessment tool                                                   | Purpose                                                                          | Age group(s)                                | Domain(s)                                                                                                             |
|-------------------------------------------------------------------|----------------------------------------------------------------------------------|---------------------------------------------|-----------------------------------------------------------------------------------------------------------------------|
| Bayley scales of infant and toddler development-II <sup>16</sup>  | Assess the developmental status of infants and children                          | 1–42 mo                                     | Cognitive development<br>Motor development                                                                            |
| Bayley scales of infant and toddler development-III <sup>17</sup> | Assess the developmental status of infants and children                          | 1–42 mo                                     | Motor development<br>Cognition<br>Language development<br>Social emotion development<br>Adaptive behavior development |
| Gross motor function classification system <sup>66</sup>          | Categorize gross motor function of children and young people with cerebral palsy | <2 y<br>2–4 y<br>4–6 y<br>6–12 y<br>12–18 y | 5 levels of classification                                                                                            |

mo, months; NDI, neurodevelopmental impairment; y, years.

Supplemental Table 6. Prevalence of NDI and CP stratified by GA at birth.

| Article*; country                       | Length of follow-up | Children with any <sup>a</sup> NDI stratified by GA, %            |               |               |                                 |                                 |        |        |
|-----------------------------------------|---------------------|-------------------------------------------------------------------|---------------|---------------|---------------------------------|---------------------------------|--------|--------|
|                                         |                     | 22 wGA                                                            | 23 wGA        | 24 wGA        | 25 wGA                          | 26 wGA                          | 27 wGA | 28 wGA |
| <i>North America</i>                    |                     |                                                                   |               |               |                                 |                                 |        |        |
| Zayek 2011; <sup>37</sup> USA           | 3.5 y               | 37                                                                | 48            | 35            | 23                              | 29                              | -      | -      |
|                                         |                     | 37 (severe)                                                       | 9 (severe)    | 13 (severe)   | 7 (severe)                      | 12 (severe)                     | -      | -      |
| Goldstein 2013; <sup>22</sup> USA       | 18–22 mo            | -                                                                 | 65            | 53            | 41                              | 36                              | 26     | 29     |
| Younge 2016; <sup>24</sup> USA          | 18–22 mo            | -                                                                 | 64            | 39            | -                               | -                               | -      | -      |
| <i>Europe</i>                           |                     |                                                                   |               |               |                                 |                                 |        |        |
| Stoinska 2011; <sup>44</sup> Poland     | 2 y                 | -                                                                 | -             | 20            |                                 |                                 | 15     |        |
| Camba 2012; <sup>59</sup> Spain         | 1–6 y               | -                                                                 | -             | 13 (moderate) | 6 (moderate)                    | -                               | -      | -      |
|                                         |                     | -                                                                 | -             | 25 (severe)   | 11 (severe)                     | -                               | -      | -      |
| De Waal 2012; <sup>45</sup> Netherlands | 2 y                 | -                                                                 | -             | 0             | 17                              | 9                               | -      | -      |
| Skiöld 2012; <sup>51</sup> Sweden       | 2.5 y               | -                                                                 | -             | 9             | 3                               | -                               | -      | -      |
| <i>Rest of World</i>                    |                     |                                                                   |               |               |                                 |                                 |        |        |
| Ishii 2013; <sup>78</sup> Japan         | 36–42 mo            | 52                                                                | 57            | 37            | 37                              | -                               | -      | -      |
|                                         |                     | 30 (profound)                                                     | 40 (profound) | 16 (profound) | 17 (profound)                   | -                               | -      | -      |
| Poon 2013; <sup>84</sup> Singapore      | 8 y                 | -                                                                 | -             | -             | 14                              | 50                              | -      | -      |
|                                         |                     | -                                                                 | -             | 0 (severe)    | (moderate-severe)<br>0 (severe) | (moderate-severe)<br>0 (severe) | -      | -      |
| <hr/>                                   |                     |                                                                   |               |               |                                 |                                 |        |        |
| Publication                             | Length of follow-up | Children with any <sup>a</sup> cerebral palsy stratified by GA, % |               |               |                                 |                                 |        |        |
|                                         |                     | 22 wGA                                                            | 23 wGA        | 24 wGA        | 25 wGA                          | 26 wGA                          | 27 wGA | 28 wGA |
| <i>North America</i>                    |                     |                                                                   |               |               |                                 |                                 |        |        |
| Zayek 2011; <sup>37</sup> USA           | 3.5 y               | 12                                                                | 9             | 5             | 0                               | 6                               | -      | -      |

|                                     |          | 12                | 0                 | 3                 | 0                 | 3                 |            |   |
|-------------------------------------|----------|-------------------|-------------------|-------------------|-------------------|-------------------|------------|---|
|                                     |          | (moderate-severe) | (moderate-severe) | (moderate-severe) | (moderate-severe) | (moderate-severe) |            |   |
| Younge 2016; <sup>24</sup> USA      | 18–22 mo | -                 | 13                | 18                | -                 | -                 | -          | - |
| <i>Europe</i>                       |          |                   |                   |                   |                   |                   |            |   |
| Stoinska 2011; <sup>44</sup> Poland | 2 y      | -                 | -                 | 30                |                   |                   | 18         |   |
| Marret 2013; <sup>64</sup> France   | 8 y      | -                 | -                 | 13                |                   |                   | 9          |   |
|                                     |          | -                 | -                 | 7 (severe)        |                   |                   | 5 (severe) |   |
| <i>Rest of World</i>                |          |                   |                   |                   |                   |                   |            |   |
| Sugiura 2012; <sup>73</sup> Japan   | 18 mo    | 13 (<24 wGA)      |                   | 5                 | 9                 | 5                 | 6          | 4 |
| Ishii 2013; <sup>78</sup> Japan     | 36–42 mo | 22                | 18                | 8                 | 15                | -                 | -          | - |
|                                     |          | 17 (profound)     | 10 (profound)     | 5 (profound)      | 9 (profound)      | -                 | -          | - |
| Poon 2013; <sup>84</sup> Singapore  | 8 y      | -                 | -                 | 0                 |                   | 50                | -          | - |

\*Articles are listed in each follow-up group chronologically by publication date, then alphabetically by first author.

<sup>a</sup>Unless indicated otherwise in parentheses.

CP, cerebral palsy; GA, gestational age; mo, months; NDI, neurodevelopmental impairment; wGA, weeks gestational age; y, years.
